# Supplementary material for: Hairy cell leukemia: a specific 17-gene expression signature points to new targets for therapy
Source: Springer Nature journal article supplement (doi:10.1007/s00432-022-04010-4), 2022-04-27

Fig. S1

correlation of cHCL/vHCL gene expression vs nB

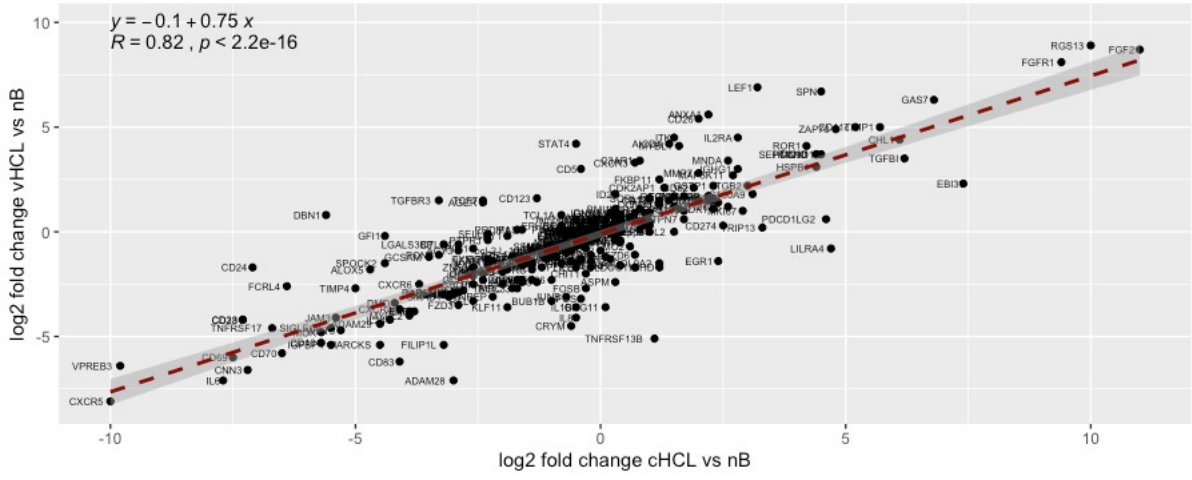

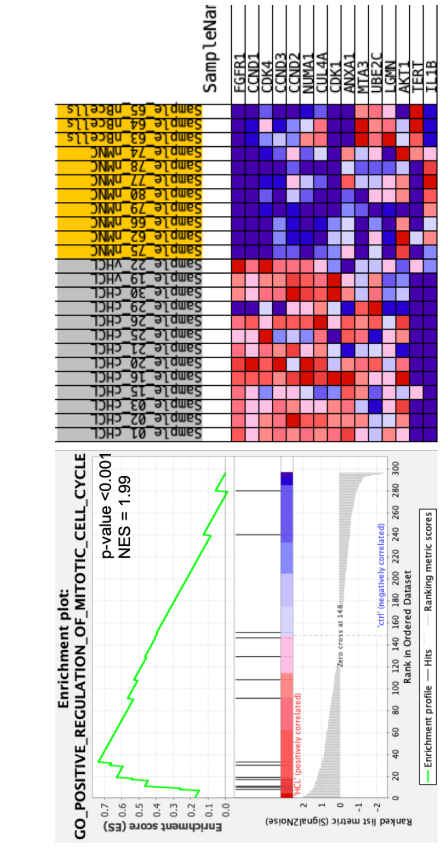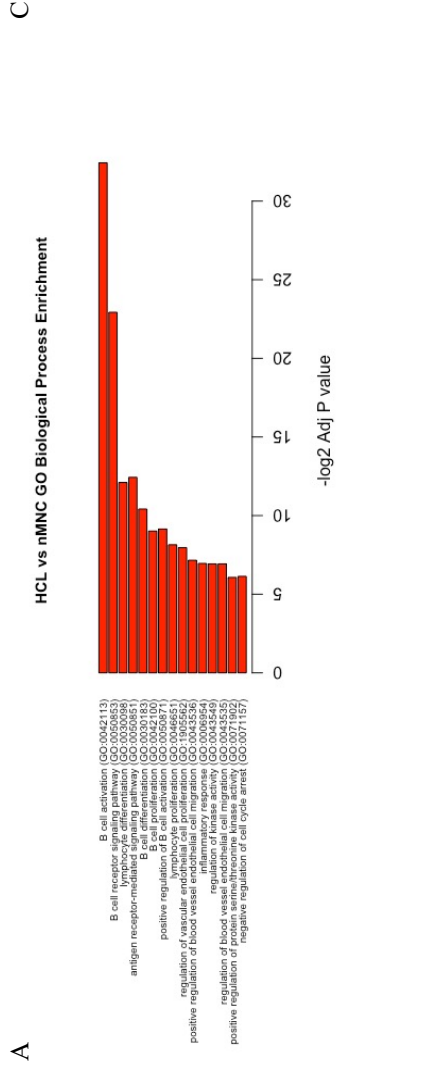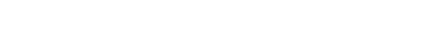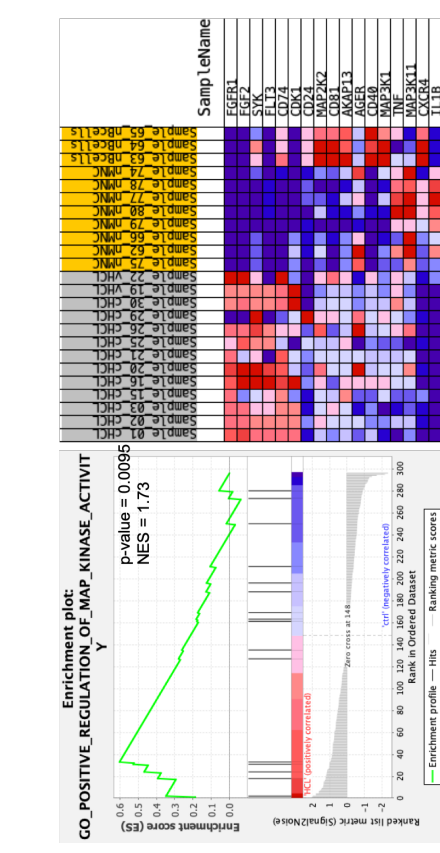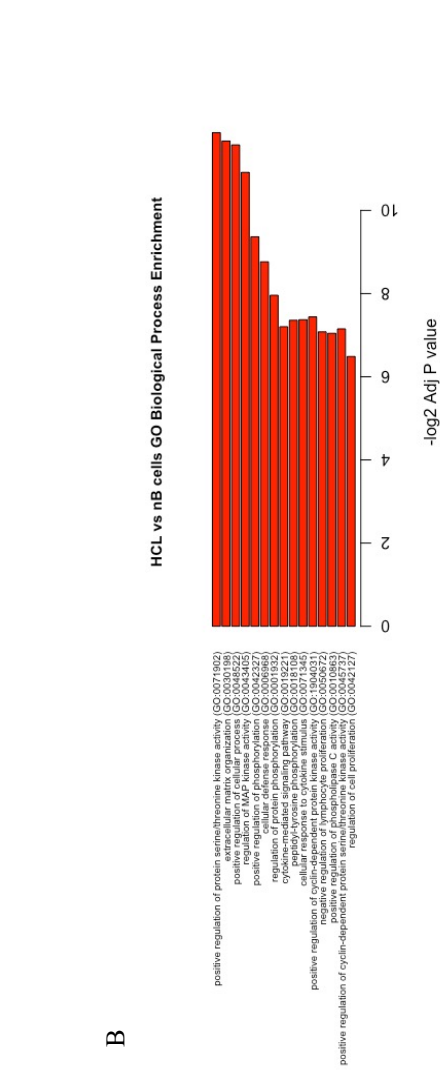

Fig. S3

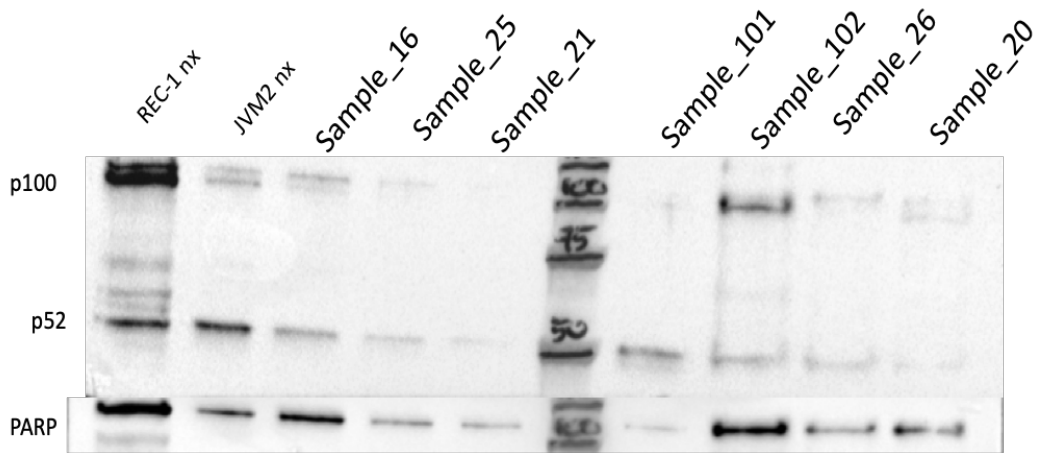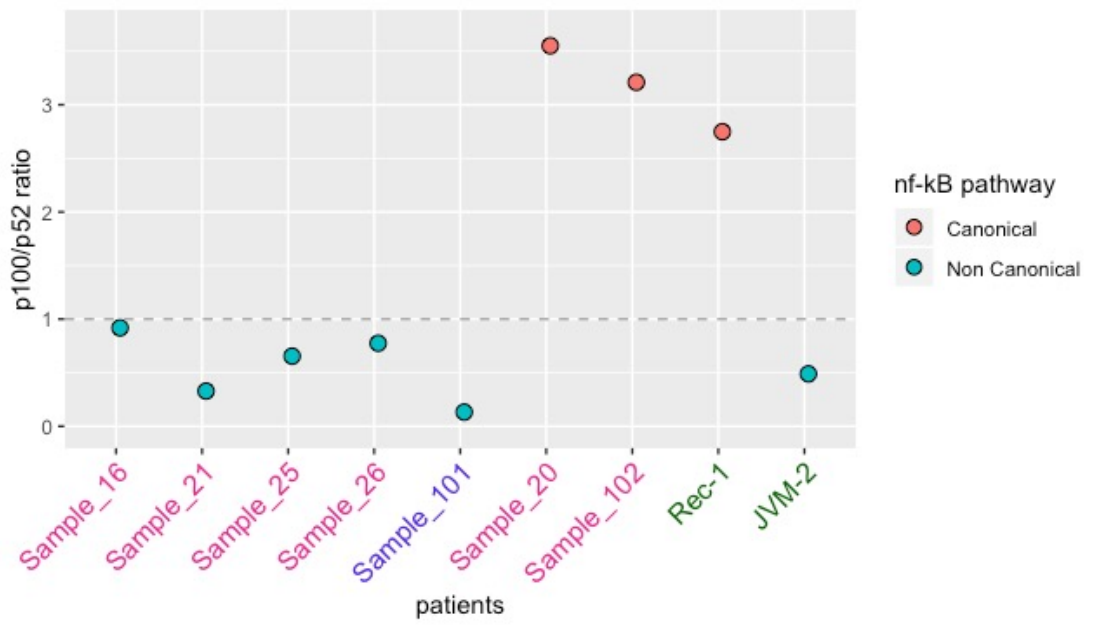

Supplement: MOESM1 [file 20349016]
