# Supplementary material for: Hairy cell leukemia: a specific 17-gene expression signature points to new targets for therapy
Source: J Cancer Res Clin Oncol. 2022 Apr 27;148(8):2013–22. doi: 10.1007/s00432-022-04010-4 (PMC9293816; doi:10.1007/s00432-022-04010-4)
Supplement: Supplementary file 5 — Supplementary file5 Table S4: List of genes expressed preferentially in HCL samples. List of genes expressed differentially in the 13 HCL samples compared to the nMNC and nB cell samples, fulfilling the following criteria: expression levels 3 20 counts, a 3 2-fold difference in expression, and a corrected p-value £0.05. a: Genes preferentially overexpressed in HCL blood samples compared to nMNC and nB cells. b: Genes preferentially underexpressed in HCL blood samples compared to nMNC and nB cells. (XLSX 14 kb) [file 432_2022_4010_MOESM5_ESM.xlsx]

## Sheet: overexpression
Table S4: List of genes expressed preferentially in HCL blood samples
a: overexpressed genes							b: underexpressed genes
HCL vs nMNC (n=65)			HCL vs nBcells (n=35)			Genes overexpressed in HCL vs (nMNC and nB cells) (n=17)	HCL vs nBcells (n=80)
genes	Adj.p value	Log2(FC)	genes	Adj.p value	Log2(FC)		genes	Adj.p value	Log2(FC)
RGS13	4.1e-07	9.5	RGS13	8.7e-05	9.1	RGS13	CXCR5	1.8e-06	-8.6
CCND1	6.4e-10	9.3	FGF2	1.8e-06	9.1	FGF2	IL6	0.0001	-7.4
FGF2	5e-07	8.8	FGFR1	1.8e-06	8.3	FGFR1	VPREB3	2.7e-05	-7.1
AICDA	1.8e-06	7.3	SPN	2e-07	6.5	GAS7	CNN3	8.9e-06	-6.9
BLNK	0.00019	6.7	FLT3	0.00054	6.4	CHL1	ADAM28	0.00016	-6.6
FGFR1	2.1e-05	6.3	GAS7	0.021	6.2	SEPTIN10	CD69	2.9e-07	-6.4
CD200	4.1e-05	6	TIMP1	0.023	5	CCND1	CD70	2.6e-05	-6.2
CD19	1.1e-11	5.9	DPP4	1.9e-05	5	AICDA	CD83	0.0001	-6
PKIG	2.2e-05	5.6	ANXA1	2.3e-06	4.9	EBI3	IGFBP4	0.009	-5.7
CHL1	4.8e-05	5.3	ITGAX	7.1e-07	4.9	IGHG	MME	2.7e-05	-5.6
MMP7	2.4e-05	5.3	ZAP70	0.009	4.8	FCGR2B	MARCKS	0.0043	-5.5
ROR1	1.8e-06	5.2	CHL1	0.028	4.7	RECK	FILIP1L	2.7e-06	-5.3
FCRL2	0.00059	5	TGFBI	0.0056	4	TTN	TNFRSF17	0.00013	-5.2
RECK	0.00015	4.8	ITK	0.017	3.9	LAIR1	MOK	6.4e-06	-5.2
TCL1A	1.4e-09	4.7	SEPTIN10	0.0019	3.9	ITGAE	SIGLEC1	0.0018	-5
CD79B	6.9e-08	4.6	CCND1	0.00029	3.7	CD180	WNT3	1.8e-05	-5
POU2AF1	0.00032	4.6	AICDA	0.0056	3.6	CD19	CD23	2.6e-05	-4.9
MS4A1	3.8e-09	4.5	EBI3	0.016	3.1		CD38	6.8e-05	-4.8
BANK1	5.3e-10	4.4	MNDA	0.0042	3.1		IL24	0.015	-4.5
PAFAH1B3	0.00051	4.3	CXCR3	0.028	2.8		JAM3	0.00069	-4.5
IGHG	2.3e-05	4.2	IGHG	1.8e-06	2.8		TNFRSF13B	0.013	-4.3
IL2RA	2.3e-05	4.2	ITGB2	0.009	2.2		MYBL2	0.029	-4.1
CD22	1.4e-09	4.1	GSTP1	1.9e-05	2.1		CRYM	0.021	-4.1
CD79A	9.3e-08	4	CD82	0.028	1.9		BIK	0.039	-4
EBF1	0.00015	3.8	CDK2AP1	0.002	1.8		IL4R	2.9e-07	-3.9
PAX5	3.6e-09	3.8	FCGR2B	0.03	1.6		CXCR4	1.2e-07	-3.9
CD180	1.1e-08	3.6	RECK	0.026	1.6		IL8	0.024	-3.7
TTN	3.6e-09	3.5	TTN	8.7e-05	1.5		DMD	0.0053	-3.7
EPHB6	0.021	3.2	CCND2	0.032	1.4		FZD3	0.0004	-3.6
FCGR2B	3.1e-07	3.2	LAIR1	0.017	1.4		KLF11	0.00064	-3.5
DMD	0.016	3.1	ITGAE	0.0019	1.4		IL1B	0.00019	-3.4
SETMAR	0.018	3	SORL1	5.1e-06	1.4		TIMP4	0.026	-3.3
BLK	3.9e-07	2.9	CD180	0.0007	1.3		FCRL4	0.02	-3.3
EBI3	0.0092	2.9	CCND3	0.00079	1.1		REL	0.0056	-3.3
FCMR	6.6e-09	2.9	CD19	0.00016	1		GNG11	0.019	-3.2
ST14	0.016	2.9					TRAF4	0.013	-3.2
HDAC9	2.5e-05	2.8					BUB1B	0.0099	-3.2
IGHM	0.00074	2.8					CXCR6	0.014	-3
KLF1	0.00081	2.8					NREP	0.00053	-3
lambda	1.8e-05	2.8					FOS	0.00042	-2.9
MEF2C	4.4e-08	2.8					TACC3	0.00053	-2.8
SEPTIN10	0.015	2.8					JUNB	2.6e-05	-2.8
CIITA	5e-05	2.7					BIRC3	5.9e-07	-2.7
IGHD	0.023	2.7					CDKN1A	0.034	-2.6
kappa	0.00081	2.7					CD24	0.016	-2.6
EPB41L2	1.5e-05	2.3					MXI1	0.032	-2.4
FZD6	0.0034	2.3					CD40	0.011	-2.4
LDOC1	0.028	2.3					ALOX5	0.0002	-2.4
ACY3	0.0082	2					MYC	0.00013	-2.4
TNFRSF13C	0.00063	1.9					JUN	0.013	-2.3
CCDC50	1e-06	1.8					IRF4	0.009	-2.3
HLA-DMA	2.7e-09	1.8					ZFP36	8.7e-05	-2.3
DNMBP	0.00082	1.6					TNFRSF13C	6.8e-05	-2.3
PWWP3A	0.022	1.6					SPOCK2	0.029	-2.1
BTK	0.012	1.5					TNFAIP3	0.024	-2
ITGAE	0.0013	1.5					ZNF3	2.7e-05	-2
CD40	0.00025	1.5					PRKCB	2.7e-06	-2
CD74	2.1e-07	1.5					BACH2	1.2e-07	-2
BACH2	0.02	1.3					TFRC	0.03	-1.9
CDK4	0.00084	1.3					BCL10	0.036	-1.7
LAIR1	0.0034	1.2					GCSAM	0.028	-1.7
SYK	0.0034	1.2					MCPH1	0.023	-1.7
GAS7	0.028	1.1					RRM2B	9.6e-06	-1.7
IGHA	0.016	1.1					EBF1	0.033	-1.6
SFMBT1	0.048	1					PON2	0.029	-1.6
							LYN	0.042	-1.5
							BCL6	0.017	-1.5
							POU2AF1	0.0053	-1.5
							TPP2	0.0012	-1.5
							BLK	0.00013	-1.5
							MAP3K1	1.9e-05	-1.5
							PAX5	2.9e-07	-1.4
							BIRC2	0.021	-1.3
							ATR	0.016	-1.3
							CD81	5.2e-06	-1.3
							LGALS3BP	0.029	-1.2
							PIM1	0.0063	-1.2
							NLRP1	0.023	-1.1
							LTB	0.018	-1
							EIF3B	0.003	-1
